# Supplementary material for: Associations of Serum Folate and Vitamin B12 Levels With Cardiovascular Disease Mortality Among Patients With Type 2 Diabetes
Source: PubMed Central journal article supplement (PMC8804919; doi:10.1001/jamanetworkopen.2021.46124), 2022-01-31
Supplement: jamanetwopen-e2146124-s001.pdf [file jamanetwopen-e2146124-s001.pdf]

## Supplementary Online Content

Liu Y, Geng T, Wan Z, et al. Associations of serum folate and vitamin B<sub>12</sub> levels with cardiovascular disease mortality among patients with type 2 diabetes. *JAMA Netw Open*. 2022;5(1):e2146124. doi:10.1001/jamanetworkopen.2021.46124

**eTable 1.** Associations Between Serum Folate With All-Cause Mortality in Various Subgroups Among Patients With T2D in NHANES III and NHANES 1999-2014

**eTable 2.** Associations Between Serum B<sub>12</sub> With All-Cause Mortality in Various Subgroups Among Patients With T2D in NHANES III and NHANES 1999-2014

**eTable 3.** HRs (95% CIs) of CVD Mortality According to Serum Folate and Vitamin B<sub>12</sub> Levels After Excluding T2D Patients With Less Than 2 Years of Follow-up

**eTable 4.** HR (95% CIs) of CVD Mortality According to Quintiles of Serum Folate and Vitamin B<sub>12</sub> Concentrations Among Patients With T2D

**eTable 5.** HRs (95% CIs) of CVD Mortality According to Serum Folate and Vitamin B<sub>12</sub> Levels Among T2D Patients With Further Adjustment of Several Biomarkers and Dietary Factors

**eTable 6.** HRs (95% CIs) of CVD Mortality According to Serum Vitamin B<sub>12</sub> Levels Among Patients With T2D in NHANES III and NHANES 1999-2014

**eTable 7.** Spearman Correlation of Baseline Serum Folate and B<sub>12</sub> With Age, BMI, HbA<sub>1c</sub>, CRP, Triglycerides, LDL, HDL, and Homocysteine Among Patients With T2D

**eFigure.** Association of Serum Folate (A) and Vitamin B<sub>12</sub> (B) With CVD Mortality Among Patients With T2D

This supplementary material has been provided by the authors to give readers additional information about their work.

**eTable 1. Associations Between Serum Folate With All-Cause Mortality in Various Subgroups Among Patients With T2D in NHANES III and NHANES 1999-2014**

|                              | Quartiles of serum folate, nmol/L |               |                    |                   | <i>P</i> interaction |
|------------------------------|-----------------------------------|---------------|--------------------|-------------------|----------------------|
|                              | Q1: <16.2                         | Q2: 16.2-27.4 | Q3: 27.5-44.0      | Q4: ≥44.1         |                      |
| <b>Age, years</b>            |                                   |               |                    |                   | .85                  |
| <60                          | 1.00 (0.74, 1.35)                 | 1.00 (ref.)   | 0.87 (0.61, 1.24)  | 1.09 (0.69, 1.73) |                      |
| ≥60                          | 1.16 (0.97, 1.38)                 | 1.00 (ref.)   | 1.06 (0.86, 1.30)  | 1.28 (1.04, 1.57) |                      |
| <b>Sex</b>                   |                                   |               |                    |                   | .91                  |
| Female                       | 1.07 (0.88, 1.30)                 | 1.00 (ref.)   | 0.88 (0.67, 1.17)  | 1.12 (0.90, 1.40) |                      |
| Male                         | 1.26 (1.00, 1.58)                 | 1.00 (ref.)   | 1.10 (0.88, 1.38)  | 1.00 (0.77, 1.29) |                      |
| <b>Race</b>                  |                                   |               |                    |                   | .83                  |
| White                        | 1.19 (0.98, 1.46)                 | 1.00 (ref.)   | 1.08 (0.84, 1.39)  | 1.07 (0.86, 1.34) |                      |
| Other                        | 1.21 (0.96, 1.53)                 | 1.00 (ref.)   | 0.89 (0.69, 1.14)  | 1.15 (0.88, 1.49) |                      |
| <b>BMI, kg/m<sup>2</sup></b> |                                   |               |                    |                   | .02                  |
| <30                          | 1.31 (0.96, 1.81)                 | 1.00 (ref.)   | 1.39 (1.05, 1.86)  | 1.27 (0.96, 1.67) |                      |
| ≥30                          | 1.36 (0.99, 1.86)                 | 1.00 (ref.)   | 0.98 (0.73, 1.31)  | 1.25 (0.93, 1.68) |                      |
| <b>Smoking status</b>        |                                   |               |                    |                   | .10                  |
| Never                        | 1.02 (0.81, 1.30)                 | 1.00 (ref.)   | 1.03 (0.77, 1.37)  | 1.23 (0.97, 1.57) |                      |
| Ever or current              | 1.25 (1.03, 1.52)                 | 1.00 (ref.)   | 0.99 (0.79, 1.23)  | 0.94 (0.75, 1.18) |                      |
| <b>Drinking status</b>       |                                   |               |                    |                   | .18                  |
| Non-drinkers                 | 1.03 (0.86, 1.25)                 | 1.00 (ref.)   | 0.97 (0.75, 1.26)  | 1.11 (0.88, 1.39) |                      |
| Drinkers                     | 1.35 (1.06, 1.71)                 | 1.00 (ref.)   | 1.06 (0.84, 1.33)  | 1.04 (0.83, 1.31) |                      |
| <b>Duration, years</b>       |                                   |               |                    |                   | .07                  |
| <10                          | 1.28 (0.98, 1.69)                 | 1.00 (ref.)   | 1.118 (0.81, 1.54) | 1.02 (0.76, 1.36) |                      |
| ≥10                          | 1.17 (0.79, 1.72)                 | 1.00 (ref.)   | 1.104 (0.77, 1.59) | 1.43 (1.00, 2.03) |                      |
| <b>Physical activity</b>     |                                   |               |                    |                   | .04                  |
| Inactive                     | 1.18 (0.91, 1.54)                 | 1.00 (ref.)   | 1.06 (0.81, 1.38)  | 1.15 (0.86, 1.54) |                      |
| Active                       | 1.48 (0.97, 2.26)                 | 1.00 (ref.)   | 1.29 (0.96, 1.73)  | 1.29 (0.90, 1.85) |                      |
| <b>HbA1c</b>                 |                                   |               |                    |                   | .40                  |
| <7.0%                        | 1.36 (1.00, 1.85)                 | 1.00 (ref.)   | 1.16 (0.80, 1.68)  | 1.18 (0.87, 1.62) |                      |
| ≥7.0%                        | 1.21 (0.87, 1.68)                 | 1.00 (ref.)   | 1.07 (0.83, 1.38)  | 1.18 (0.82, 1.69) |                      |
| <b>Hypertension</b>          |                                   |               |                    |                   | .27                  |
| Yes                          | 1.43 (1.08, 1.89)                 | 1.00 (ref.)   | 1.20 (0.90, 1.60)  | 1.29 (1.02, 1.64) |                      |
| No                           | 1.04 (0.72, 1.50)                 | 1.00 (ref.)   | 0.97 (0.66, 1.41)  | 1.10 (0.77, 1.56) |                      |
| <b>Hypercholesterolemia</b>  |                                   |               |                    |                   | .11                  |
| Yes                          | 1.21 (0.86, 1.70)                 | 1.00 (ref.)   | 1.14 (0.85, 1.54)  | 1.20 (0.86, 1.67) |                      |
| No                           | 1.27 (0.97, 1.67)                 | 1.00 (ref.)   | 1.13 (0.81, 1.59)  | 1.24 (0.91, 1.68) |                      |

HRs (95% CIs) were adjusted for age (continuous), sex (male, or female), race/ethnicity (non-Hispanic white, non-Hispanic black, Mexican American, or other), BMI (<25.0, 25.0-29.9, or ≥30.0 kg/m<sup>2</sup>), education level (less than high school, high school or equivalent, or college or above), family income level (lower, normal, higher), smoking status (never smoker, ever smoker, or current smoker), drinking status (never drinker, ever drinker, or current drinker), physical activity (inactive, or active), HEI (continuous), duration of diabetes (<3, 3-10, or >10 years), diabetes medication use (none, only diabetes pills, only insulin, or diabetes pill and insulin), HbA1c (<7%, ≥7%), self-reported hypertension (yes or no), self-reported hypercholesterolemia (yes or no). The strata variable was not included when stratifying by itself.

**eTable 2. Associations Between Serum B<sub>12</sub> With All-Cause Mortality in Various Subgroups Among Patients With T2D in NHANES III and NHANES 1999-2014**

|                              | Quartiles of serum vitamin B <sub>12</sub> , pmol/L |                 |                   |                   | P <sub>interaction</sub> |
|------------------------------|-----------------------------------------------------|-----------------|-------------------|-------------------|--------------------------|
|                              | Q1: <272.3                                          | Q2: 272.3-373.3 | Q3: 373.4-519.0   | Q4: ≥519.1        |                          |
| <b>Age, years</b>            |                                                     |                 |                   |                   | .48                      |
| <60                          | 1.13 (0.74, 1.73)                                   | 1.00 (ref.)     | 1.78 (1.13, 2.81) | 1.71 (1.05, 2.77) |                          |
| ≥60                          | 1.07 (0.91, 1.25)                                   | 1.00 (ref.)     | 1.10 (0.86, 1.40) | 1.14 (0.92, 1.41) |                          |
| <b>Sex</b>                   |                                                     |                 |                   |                   | .75                      |
| Female                       | 1.09 (0.83, 1.44)                                   | 1.00 (ref.)     | 1.42 (1.06, 1.89) | 1.23 (0.88, 1.70) |                          |
| Male                         | 1.11 (0.86, 1.43)                                   | 1.00 (ref.)     | 1.30 (0.94, 1.79) | 1.36 (1.01, 1.82) |                          |
| <b>Race</b>                  |                                                     |                 |                   |                   | .97                      |
| White                        | 1.01 (0.83, 1.22)                                   | 1.00 (ref.)     | 1.43 (1.08, 1.88) | 1.27 (0.94, 1.71) |                          |
| Other                        | 1.48 (1.09, 2.01)                                   | 1.00 (ref.)     | 1.28 (0.95, 1.71) | 1.40 (0.99, 1.98) |                          |
| <b>BMI, kg/m<sup>2</sup></b> |                                                     |                 |                   |                   | .53                      |
| <30                          | 0.87 (0.66, 1.13)                                   | 1.00 (ref.)     | 1.11 (0.84, 1.48) | 1.19 (0.89, 1.59) |                          |
| ≥30                          | 1.33 (1.01, 1.76)                                   | 1.00 (ref.)     | 1.59 (1.18, 2.15) | 1.29 (0.93, 1.80) |                          |
| <b>Smoking status</b>        |                                                     |                 |                   |                   | .85                      |
| Never                        | 1.08 (0.79, 1.48)                                   | 1.00 (ref.)     | 1.44 (1.05, 1.97) | 1.34 (0.95, 1.89) |                          |
| Ever or current              | 1.15 (0.91, 1.45)                                   | 1.00 (ref.)     | 1.36 (1.01, 1.83) | 1.25 (0.95, 1.66) |                          |
| <b>Drinking status</b>       |                                                     |                 |                   |                   | .17                      |
| Non-drinkers                 | 1.15 (0.91, 1.46)                                   | 1.00 (ref.)     | 1.40 (1.06, 1.85) | 1.19 (0.91, 1.56) |                          |
| Drinkers                     | 1.06 (0.80, 1.41)                                   | 1.00 (ref.)     | 1.33 (0.97, 1.81) | 1.29 (0.92, 1.80) |                          |
| <b>Duration, years</b>       |                                                     |                 |                   |                   | .58                      |
| <10                          | 1.18 (0.92, 1.50)                                   | 1.00 (ref.)     | 1.46 (1.13, 1.90) | 1.54 (1.15, 2.07) |                          |
| ≥10                          | 1.07 (0.80, 1.44)                                   | 1.00 (ref.)     | 1.29 (0.92, 1.81) | 1.09 (0.80, 1.48) |                          |
| <b>Physical activity</b>     |                                                     |                 |                   |                   | .97                      |
| Inactive                     | 1.24 (1.00, 1.54)                                   | 1.00 (ref.)     | 1.51 (1.20, 1.90) | 1.42 (1.14, 1.77) |                          |
| Active                       | 0.86 (0.62, 1.20)                                   | 1.00 (ref.)     | 1.19 (0.83, 1.72) | 1.18 (0.81, 1.71) |                          |
| <b>HbA1c</b>                 |                                                     |                 |                   |                   | .84                      |
| <7.0%                        | 1.05 (0.84, 1.32)                                   | 1.00 (ref.)     | 1.17 (0.86, 1.59) | 1.27 (0.94, 1.70) |                          |
| ≥7.0%                        | 1.18 (0.90, 1.55)                                   | 1.00 (ref.)     | 1.48 (1.09, 2.02) | 1.27 (0.92, 1.76) |                          |
| <b>Hypertension</b>          |                                                     |                 |                   |                   | .29                      |
| Yes                          | 0.95 (0.71, 1.28)                                   | 1.00 (ref.)     | 1.10 (0.80, 1.52) | 1.19 (0.85, 1.67) |                          |
| No                           | 1.21 (0.86, 1.70)                                   | 1.00 (ref.)     | 1.10 (0.76, 1.59) | 1.53 (1.13, 2.09) |                          |
| <b>Hypercholesterolemia</b>  |                                                     |                 |                   |                   | .16                      |
| Yes                          | 2.10 (1.12, 3.91)                                   | 1.00 (ref.)     | 2.04 (1.06, 3.93) | 2.45 (1.35, 4.44) |                          |
| No                           | 1.50 (0.90, 2.52)                                   | 1.00 (ref.)     | 1.57 (0.87, 2.83) | 2.51 (1.47, 4.29) |                          |

HRs (95% CIs) were adjusted for age (continuous), sex (male, or female), race/ethnicity (non-Hispanic white, non-Hispanic black, Mexican American, or other), BMI (<25.0, 25.0-29.9, or ≥30.0 kg/m<sup>2</sup>), education level (less than high school, high school or equivalent, or college or above), family income level (lower, normal, higher), smoking status (never smoker, ever smoker, or current smoker), drinking status (never drinker, ever drinker, or current drinker), physical activity (inactive, or active), HEI (continuous), duration of diabetes (<3, 3-10, or >10 years), diabetes medication use (none, only diabetes pills, only insulin, or diabetes pill and insulin), HbA1c (<7%, ≥7%), self-reported hypertension (yes or no), and self-reported hypercholesterolemia (yes or no). The strata variable was not included when stratifying by itself.

**eTable 3. HRs (95% CIs) of CVD Mortality According to Serum Folate and Vitamin B<sub>12</sub> Levels After Excluding T2D Patients With Less Than 2 Years of Follow-up**

|                      | Serum folate concentrations (nmol/L) |               |                   |                   | Serum vitamin B <sub>12</sub> concentrations (pmol/L) |                 |                   |                   |
|----------------------|--------------------------------------|---------------|-------------------|-------------------|-------------------------------------------------------|-----------------|-------------------|-------------------|
|                      | Q1: <16.2                            | Q2: 16.2-27.4 | Q3: 27.5-44.0     | Q4: ≥44.1         | Q1: <272.3                                            | Q2: 272.3-373.3 | Q3: 373.4-519.0   | Q4: ≥519.1        |
| <b>CVD mortality</b> |                                      |               |                   |                   |                                                       |                 |                   |                   |
| No. deaths/total     | 306/1802                             | 149/1737      | 138/1730          | 90/1656           | 114/1064                                              | 72/1069         | 96/1061           | 104/1032          |
| Model 1 <sup>a</sup> | 1.47 (1.00, 2.17)                    | 1.00 (ref.)   | 1.31 (0.94, 1.83) | 1.12 (0.79, 1.58) | 1.85 (1.13, 3.00)                                     | 1.00 (ref.)     | 1.69 (1.07, 2.65) | 2.88 (1.88, 4.41) |
| Model 2 <sup>b</sup> | 1.48 (1.03, 2.12)                    | 1.00 (ref.)   | 1.44 (1.05, 1.98) | 1.21 (0.86, 1.71) | 1.89 (1.23, 2.91)                                     | 1.00 (ref.)     | 1.96 (1.27, 3.02) | 2.78 (1.84, 4.20) |

a Adjusted for age (continuous), sex (male, or female), and race (non-Hispanic white, non-Hispanic black, Mexican American, or other).

b Model 1+ BMI (<25.0, 25.0-29.9, or ≥30.0 kg/m<sup>2</sup>), education level (less than high school, high school or equivalent, or college or above), family income level (lower, normal, higher), smoking status (never smoker, ever smoker, or current smoker), drinking status (never drinker, ever drinker, or current drinker), physical activity (inactive, active), HEI (continuous), duration of diabetes (<3, 3-10, or >10 years), diabetes medication use (none, only diabetes pills, only insulin, or diabetes pill and insulin), HbA1c (<7%, ≥7%), self-reported hypertension (yes, no), and self-reported hypercholesterolemia (yes, no).

**eTable 4. HR (95% CIs) of CVD Mortality According to Quintiles of Serum Folate and Vitamin B<sub>12</sub> Concentrations Among Patients With T2D**

|                      | Serum folate concentrations (nmol/L) |                   |                   |                   |                   | Serum B <sub>12</sub> concentrations (pmol/L) |                 |                   |                   |                   |
|----------------------|--------------------------------------|-------------------|-------------------|-------------------|-------------------|-----------------------------------------------|-----------------|-------------------|-------------------|-------------------|
|                      | Q1<br>(<13.9)                        | Q2<br>(13.9-22.7) | Q3<br>(22.8-33.0) | Q4<br>(33.1-49.9) | Q5<br>(≥50.0)     | Q1<br>(<253)                                  | Q2<br>(253-332) | Q3<br>(333-421)   | Q4<br>(422-564)   | Q5<br>(≥565)      |
| <b>CVD mortality</b> |                                      |                   |                   |                   |                   |                                               |                 |                   |                   |                   |
| No. deaths/total     | 302/1544                             | 164/1536          | 122/1537          | 117/1545          | 94/1538           | 115/974                                       | 74/970          | 94/974            | 82/970            | 102/972           |
| Model 1 <sup>a</sup> | 1.41 (1.07, 1.85)                    | 1.00 (ref.)       | 0.85 (0.61, 1.18) | 0.97 (0.71, 1.33) | 0.86 (0.63, 1.16) | 2.14 (1.33, 3.44)                             | 1.00 (ref.)     | 1.84 (1.22, 2.78) | 1.43 (0.97, 2.11) | 2.88 (1.91, 4.36) |
| Model 2 <sup>b</sup> | 1.46 (1.09, 1.96)                    | 1.00 (ref.)       | 0.90 (0.63, 1.29) | 1.06 (0.77, 1.45) | 0.96 (0.70, 1.33) | 2.05 (1.32, 3.19)                             | 1.00 (ref.)     | 1.85 (1.24, 2.76) | 1.49 (1.01, 2.21) | 2.66 (1.75, 4.04) |

a Adjusted for age (continuous), sex (male, or female), and race (non-Hispanic white, non-Hispanic black, Mexican American, or other).

b Model 1+ BMI (<25.0, 25.0-29.9, or ≥30.0 kg/m<sup>2</sup>), education level (less than high school, high school or equivalent, or college or above), family income level (lower, normal, higher), smoking status (never smoker, ever smoker, or current smoker), drinking status (never drinker, ever drinker, or current drinker), physical activity (inactive, or active), HEI (continuous), duration of diabetes (≤3, 3-10, or >10 years), diabetes medication use (none, only diabetes pills, only insulin, or diabetes pill and insulin), HbA1c (<7%, ≥7%), self-reported hypertension (yes or no), self-reported hypercholesterolemia (yes or no).

**eTable 5. HRs (95% CIs) of CVD Mortality According to Serum Folate and Vitamin B<sub>12</sub> Levels Among T2D Patients With Further Adjustment of Several Biomarkers and Dietary Factors**

|                  | N        | Serum folate concentrations (nmol/L) |               |                   |                   | N        | Serum B <sub>12</sub> concentrations (pmol/L) |                 |                   |                   |
|------------------|----------|--------------------------------------|---------------|-------------------|-------------------|----------|-----------------------------------------------|-----------------|-------------------|-------------------|
|                  |          | Q1: <16.2                            | Q2: 16.2-27.4 | Q3: 27.5-44.0     | Q4: ≥44.1         |          | Q1: <272.3                                    | Q2: 272.3-373.3 | Q3: 373.4-519.0   | Q4: ≥519.1        |
| No. deaths/total |          | 345/1929                             | 180/1921      | 159/1925          | 115/1925          |          | 138/1213                                      | 88/1216         | 117/1216          | 124/1215          |
| Model 1          | 770<br>0 | 1.43 (1.04, 1.98)                    | 1.00 (ref.)   | 1.17 (0.88, 1.57) | 1.03 (0.74, 1.44) | 486<br>0 | 1.74 (1.20, 2.52)                             | 1.00 (ref.)     | 1.79 (1.19, 2.71) | 2.32 (1.60, 3.35) |
| Model 2          | 484<br>1 | 1.72 (1.03, 2.87)                    | 1.00 (ref.)   | 1.27 (0.85, 1.89) | 1.01 (0.62, 1.65) | 484<br>1 | 1.69 (1.15, 2.47)                             | 1.00 (ref.)     | 1.80 (1.18, 2.74) | 2.44 (1.61, 3.72) |
| Model 3          | 548<br>0 | 1.53 (1.00, 2.34)                    | 1.00 (ref.)   | 1.22 (0.82, 1.81) | 1.20 (0.76, 1.91) | 348<br>1 | 1.54 (0.93, 2.56)                             | 1.00 (ref.)     | 1.85 (1.04, 3.29) | 2.71 (1.60, 4.62) |
| Model 4          | 605<br>1 | 1.54 (0.92, 2.61)                    | 1.00 (ref.)   | 1.24 (0.79, 1.92) | 1.26 (0.80, 1.98) | 324<br>3 | 1.98 (1.04, 3.79)                             | 1.00 (ref.)     | 2.08 (1.15, 3.76) | 3.31 (1.89, 5.78) |
| Model 5          | 284<br>9 | 1.40 (1.01, 1.94)                    | 1.00 (ref.)   | 1.23 (0.91, 1.67) | 1.11 (0.78, 1.59) | 184<br>2 | 1.63 (1.10, 2.43)                             | 1.00 (ref.)     | 1.69 (1.11, 2.58) | 2.22 (1.49, 3.30) |
| Model 6          | 311<br>6 | 1.34 (0.76, 2.37)                    | 1.00 (ref.)   | 1.34 (0.89, 2.01) | 1.05 (0.62, 1.78) | 310<br>9 | 1.54 (1.00, 2.37)                             | 1.00 (ref.)     | 1.74 (1.12, 2.71) | 2.44 (1.63, 3.65) |
| Model 7          | 706<br>6 | 1.41 (0.93, 2.04)                    | 1.00 (ref.)   | 1.37 (0.95, 1.98) | 1.16 (0.73, 1.83) | 482<br>5 | 1.67 (1.12, 2.50)                             | 1.00 (ref.)     | 1.78 (1.18, 2.70) | 2.25 (1.52, 3.33) |
| Model 8          | 759<br>0 | 1.38 (0.97, 1.95)                    | 1.00 (ref.)   | 1.30 (0.97, 1.74) | 1.15 (0.80, 1.65) | 483<br>1 | 1.61 (1.05, 2.47)                             | 1.00 (ref.)     | 1.56 (1.03, 2.38) | 2.28 (1.53, 3.41) |
| Model 9          | 367<br>1 | 1.56 (1.06, 2.12)                    | 1.00 (ref.)   | 1.61 (1.10, 2.57) | 1.34 (0.83, 2.17) | 237<br>8 | 1.98 (1.07, 3.66)                             | 1.00 (ref.)     | 1.43 (0.73, 2.79) | 3.05 (1.59, 5.83) |

|          |          |                      |             |                      |                      |          |                      |             |                      |                      |
|----------|----------|----------------------|-------------|----------------------|----------------------|----------|----------------------|-------------|----------------------|----------------------|
| Model 10 | 770<br>0 | 1.53 (1.01,<br>2.30) | 1.00 (ref.) | 1.38 (0.94,<br>2.01) | 1.14 (0.72,<br>1.79) | 486<br>0 | 1.71 (1.16,<br>2.51) | 1.00 (ref.) | 1.79 (1.19,<br>2.70) | 2.27 (1.56,<br>3.32) |
|----------|----------|----------------------|-------------|----------------------|----------------------|----------|----------------------|-------------|----------------------|----------------------|

Model 1: Adjusted for age (continuous), sex (male, or female), and race (non-Hispanic white, non-Hispanic black, Mexican American, or other), BMI (<25.0, 25.0-29.9, or ≥30.0 kg/m<sup>2</sup>), education level (less than high school, high school or equivalent, or college or above), family income level (lower, normal, higher), smoking status (never smoker, ever smoker, or current smoker), drinking status (never drinker, ever drinker, or current drinker), physical activity (inactive, active), HEI (continuous), duration of diabetes (<3, 3-10, or >10 years), diabetes medication use (none, only diabetes pills, only insulin, or diabetes pill and insulin), HbA1c (<7%, ≥7%), self-reported hypertension (yes, no), self-reported hypercholesterolemia (yes, no).

Model 2: Model 1 + mutually adjustment of serum folate and vitamin B12.

Model 3: further excluded participants who had CVD history at baseline based on Model 1.

Model 4: Model 1 + CRP.

Model 5: Model 1 + triglycerides, LDL, and HDL.

Model 6: Model 1 + homocysteine.

Model 7: Model 1 + AST, ALT, GGT, LDH.

Model 8: Model 1 + GFR.

Model 9: Model 1 + vitamin B12 supplements and folate supplements.

Model 10: Model 1 + dietary vitamin B12 and folate intake.

**eTable 6. HRs (95% CIs) of CVD Mortality According to Serum Vitamin B<sub>12</sub> Levels Among Patients With T2D in NHANES III and NHANES 1999-2014**

|                      | Serum vitamin B12 concentrations (pmol/L) |             |                   |                   |                   |
|----------------------|-------------------------------------------|-------------|-------------------|-------------------|-------------------|
|                      | <272.3                                    | 272.3-373.3 | 373.4-519.0       | 519.1-701.0       | ≥701.1            |
| <b>CVD mortality</b> |                                           |             |                   |                   |                   |
| No. deaths/total     | 138/1213                                  | 88/1216     | 117/1216          | 78/708            | 46/507            |
| Model 1 <sup>a</sup> | 1.80 (1.16, 2.78)                         | 1.00 (ref.) | 1.67 (1.08, 2.56) | 2.63 (1.69, 4.10) | 2.25 (1.45, 3.49) |
| Model 2 <sup>b</sup> | 1.73 (1.19, 2.53)                         | 1.00 (ref.) | 1.77 (1.17, 2.67) | 2.63 (1.72, 4.05) | 1.84 (1.14, 2.98) |

<sup>a</sup> Adjusted for age (continuous), sex (male, or female), and race (non-Hispanic white, non-Hispanic black, Mexican American, or other).

<sup>b</sup> Model 1+ BMI (<25.0, 25.0-29.9, or ≥30.0 kg/m<sup>2</sup>), education level (less than high school, high school or equivalent, or college or above), family income level (lower, normal, higher), smoking status (never smoker, ever smoker, or current smoker), drinking status (never drinker, ever drinker, or current drinker), physical activity (inactive, active), HEI (continuous), duration of diabetes (<3, 3-10, or >10 years), diabetes medication use (none, only diabetes pills, only insulin, or diabetes pill and insulin), HbA1c (<7%, ≥7%), self-reported hypertension (yes, no), and self-reported hypercholesterolemia (yes, no).



**eTable 7. Spearman Correlation of Baseline Serum Folate and B<sub>12</sub> With Age, BMI, HbA1c, CRP, Triglycerides, LDL, HDL, and Homocysteine Among Patients With T2D**

|                                   |   | Serum folate | Serum vitamin B12 |
|-----------------------------------|---|--------------|-------------------|
| <b>Age (years)</b>                |   | 0.18**       | -0.02             |
|                                   | N | 7700         | 4860              |
| <b>BMI (kg/m<sup>2</sup>)</b>     |   | -0.02        | -0.08**           |
|                                   | N | 7700         | 4860              |
| <b>HbA1c (%)</b>                  |   | 0.01         | 0.07**            |
|                                   | N | 7678         | 4852              |
| <b>CRP (mg/dL)</b>                |   | -0.15**      | 0.07**            |
|                                   | N | 6051         | 3243              |
| <b>Total cholesterol (mmol/L)</b> |   | -0.19**      | 0.02              |
|                                   | N | 7649         | 4849              |
| <b>Triglyceride (mmol/L)</b>      |   | -0.02*       | -0.06**           |
|                                   | N | 7616         | 4838              |
| <b>LDL (mmol/L)</b>               |   | -0.17**      | 0.02              |
|                                   | N | 2880         | 1853              |
| <b>HDL (mmol/L)</b>               |   | 0.09**       | 0.09**            |
|                                   | N | 7613         | 4831              |
| <b>Homocysteine (umol/L)</b>      |   | -0.09**      | -0.22**           |
|                                   | N | 3116         | 3109              |

\**P*<.05, \*\**P*<.01

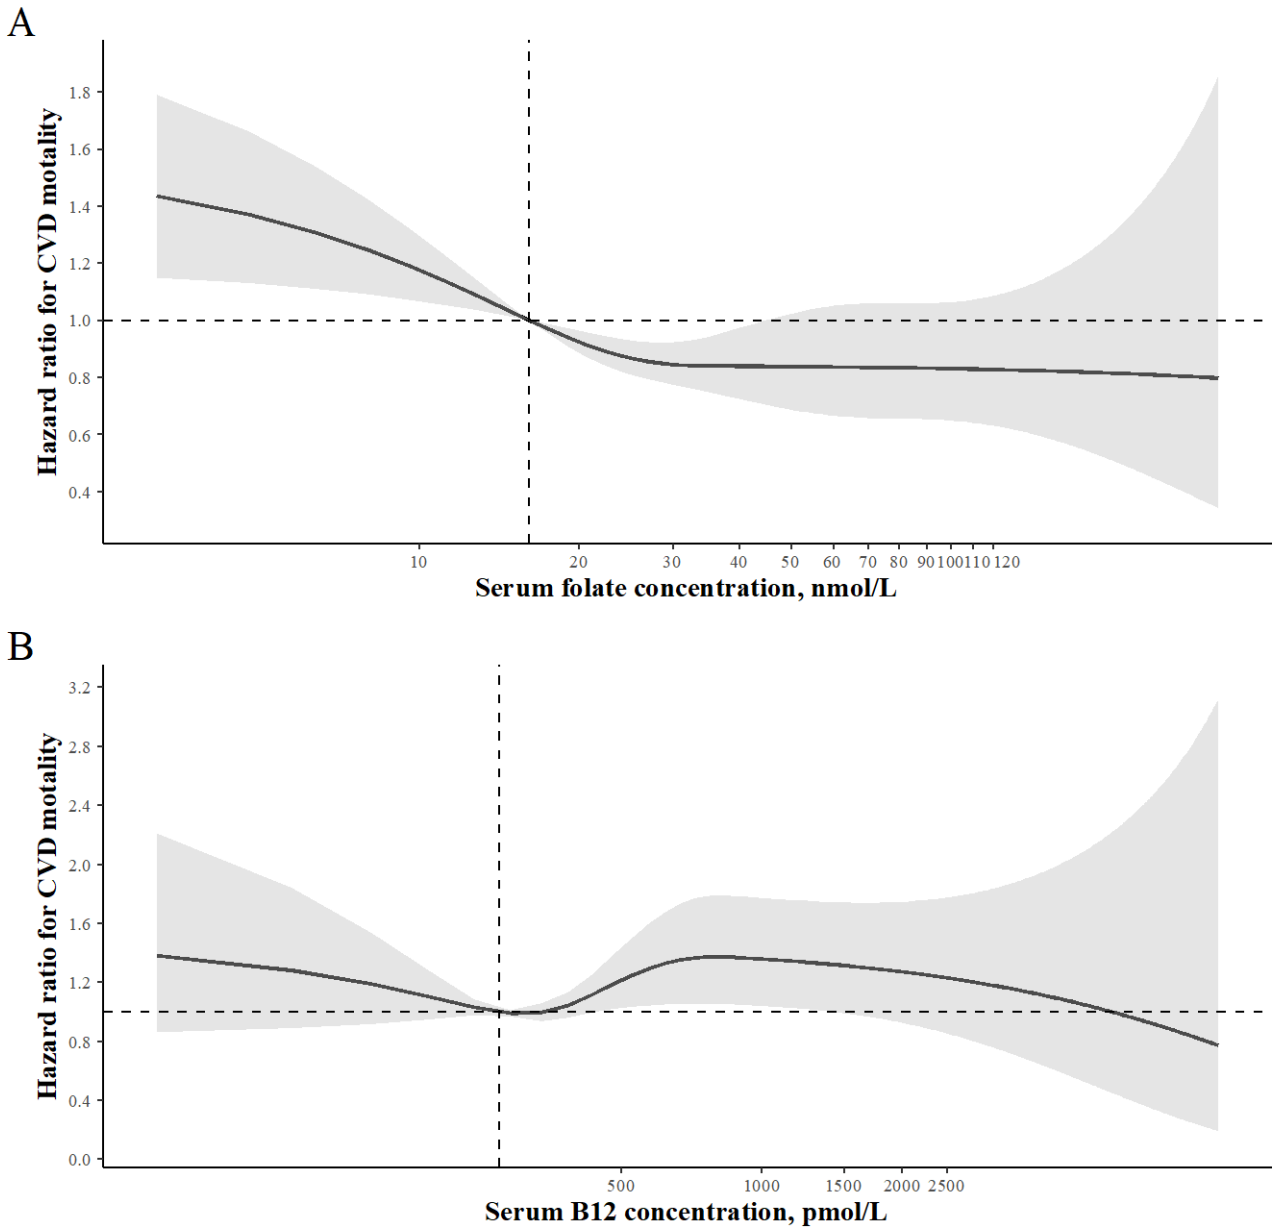

**eFigure. Association of Serum Folate (A) and Vitamin B<sub>12</sub> (B) With CVD Mortality Among Patients With T2D**

HRs (95% CIs) were adjusted for age (continuous), sex (male, or female), race/ethnicity (non-Hispanic white, non-Hispanic black, Mexican American, or other), BMI (<25.0, 25.0-29.9, or ≥30.0 kg/m<sup>2</sup>), education level (less than high school, high school or equivalent, or college or above), family income level (lower, normal, higher), smoking status (never smoker, ever smoker, or current smoker), drinking status (never drinker, ever drinker, or current drinker), physical activity (inactive, active), HEI (continuous), duration of diabetes (<3, 3-10, or >10 years), diabetes medication use (none, only diabetes pills, only insulin, or diabetes pill and insulin), HbA1c (<7%, ≥7%), self-reported hypertension (yes, no), and self-reported hypercholesterolemia (yes, no). P-nonlinearity=.02 in A. P-nonlinearity=.04 in B.
